# Supplementary material
Source: publisher figshare collection journal article supplement (https://acs.figshare.com/ndownloader/files/3625215)
Supplement: Supplementary file 1 [file 3625215]

## Supporting Information

### Synthetic middle-distillate-range hydrocarbons via catalytic dimerization of branched C<sub>6</sub>-C<sub>8</sub> olefins derived from renewable dimethyl ether

Mayank Behl<sup>1</sup>, Joshua A. Schaidle<sup>1</sup>, Earl Christensen<sup>2</sup> and Jesse E. Hensley<sup>1,\*</sup>

<sup>1</sup>National Bioenergy Center, <sup>2</sup>Transportation and Hydrogen Systems Center, National Renewable Energy Laboratory, Golden, Colorado 80401 (USA)

\*Email: [jesse.hensley@nrel.gov](mailto:jesse.hensley@nrel.gov)

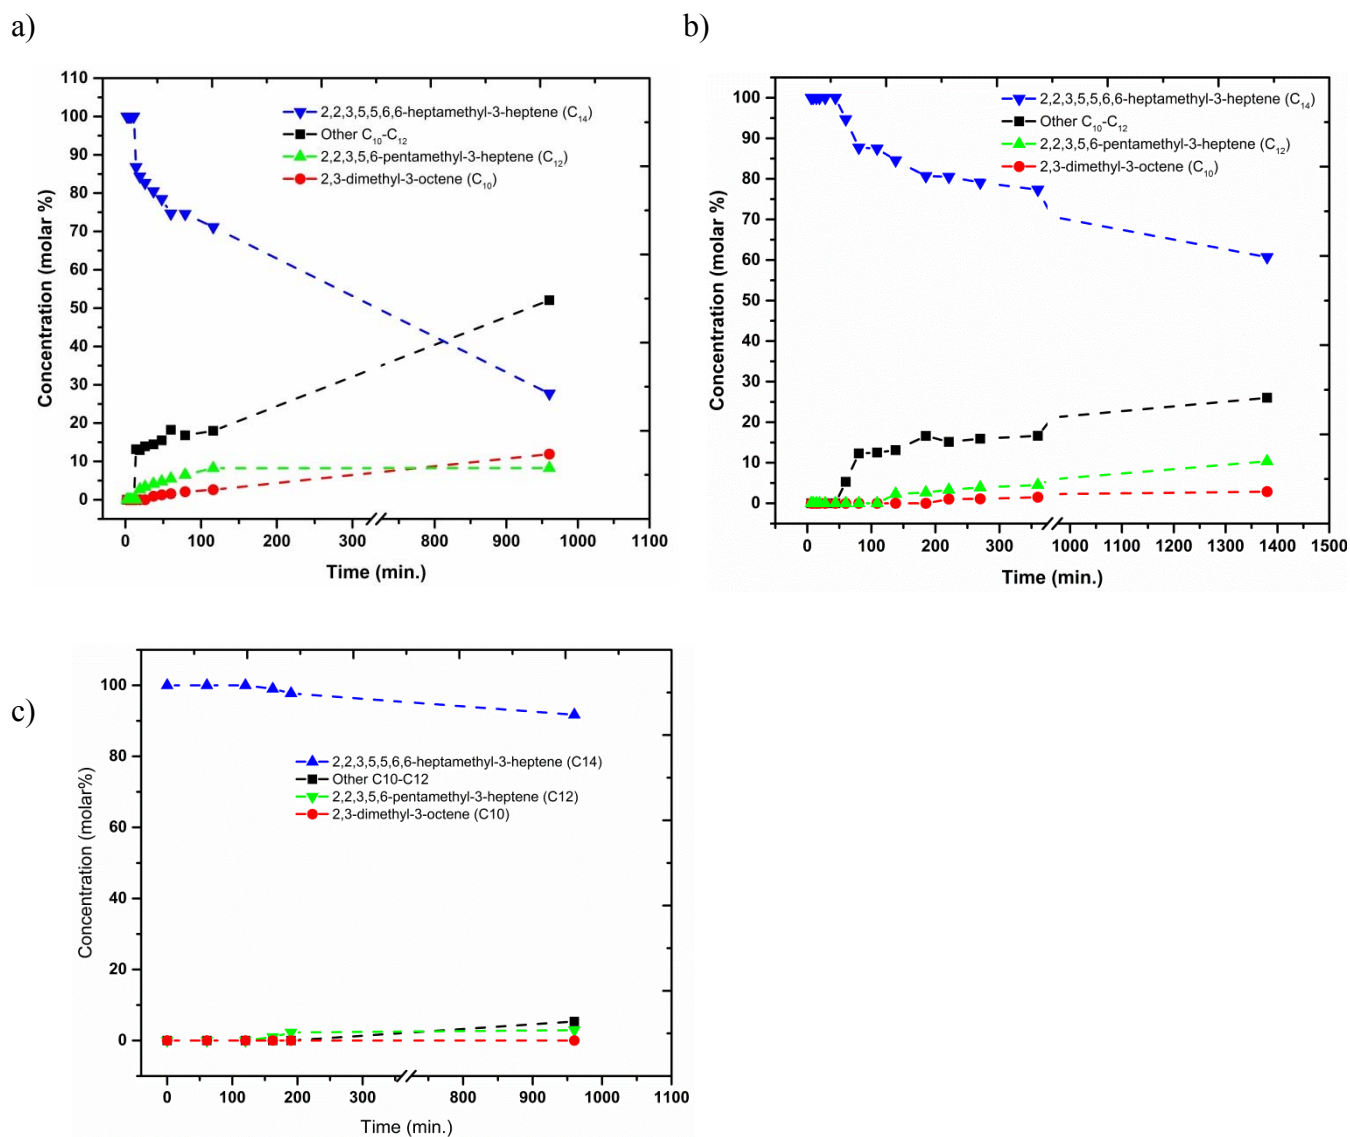

**Figure S1:** Evolution of different C<sub>10</sub> – C<sub>14</sub> range products (as percentage) obtained from triptene dimerization over Amberlyst-35 at (a) 100 °C, (b) 80 °C and (c) 60 °C

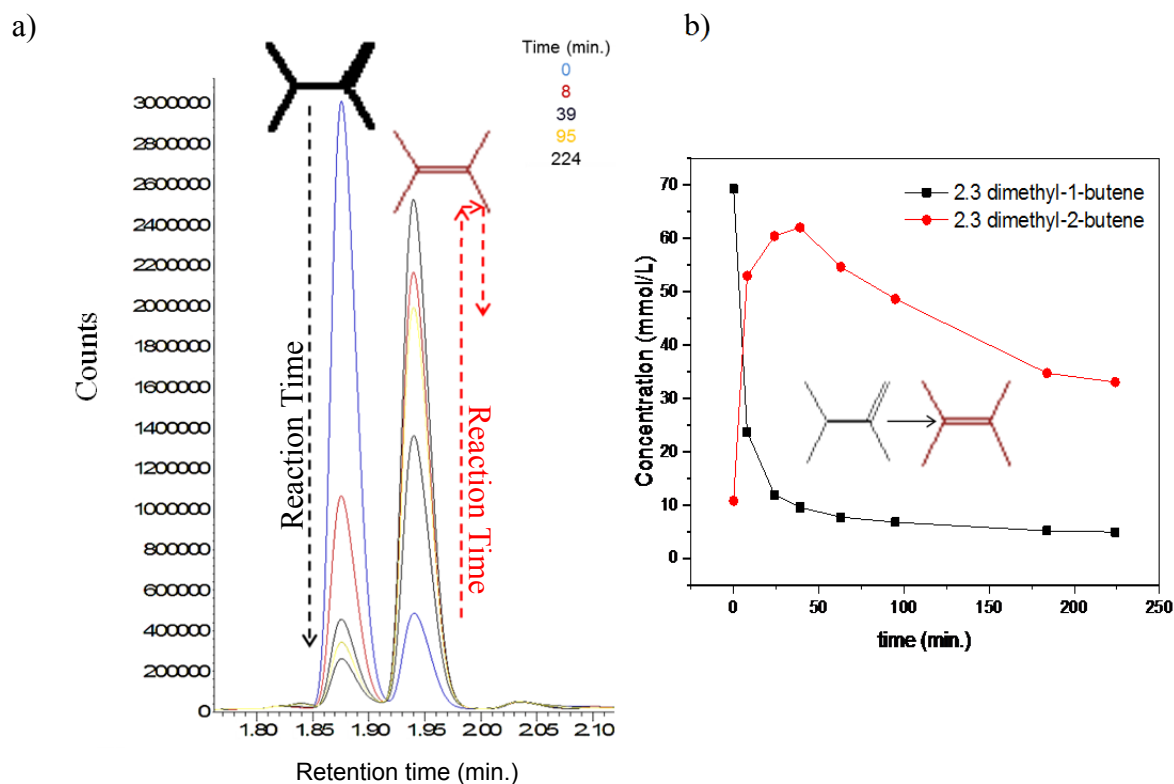

**Figure S2:** (a) FID signal and (b) Concentration-time profile corresponding to 2,3-dimethyl-1-butene during its reaction over Amberlyst-35 displaying quick initial isomerization to non-terminal 2,3-dimethyl-2-butene that converts at a relatively slower rate.

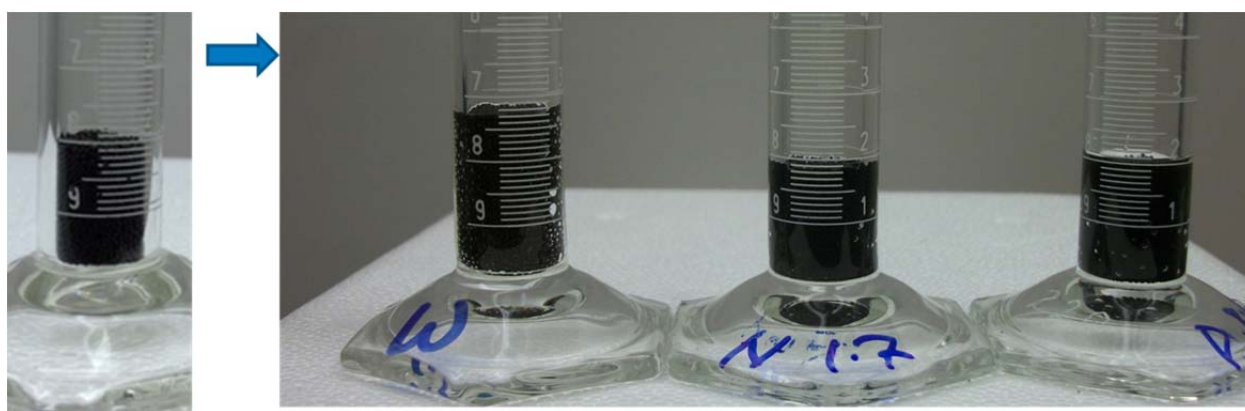

**Figure S3:** Photographs of Amberlyst-35 before and after exposure to solvent (from left to right: Amberlyst-35 with no solvent, with added water, nonane and pentadecane). In nonane and pentadecane, Amberlyst-35 exhibits negligible swelling as compared to swelling caused by water.

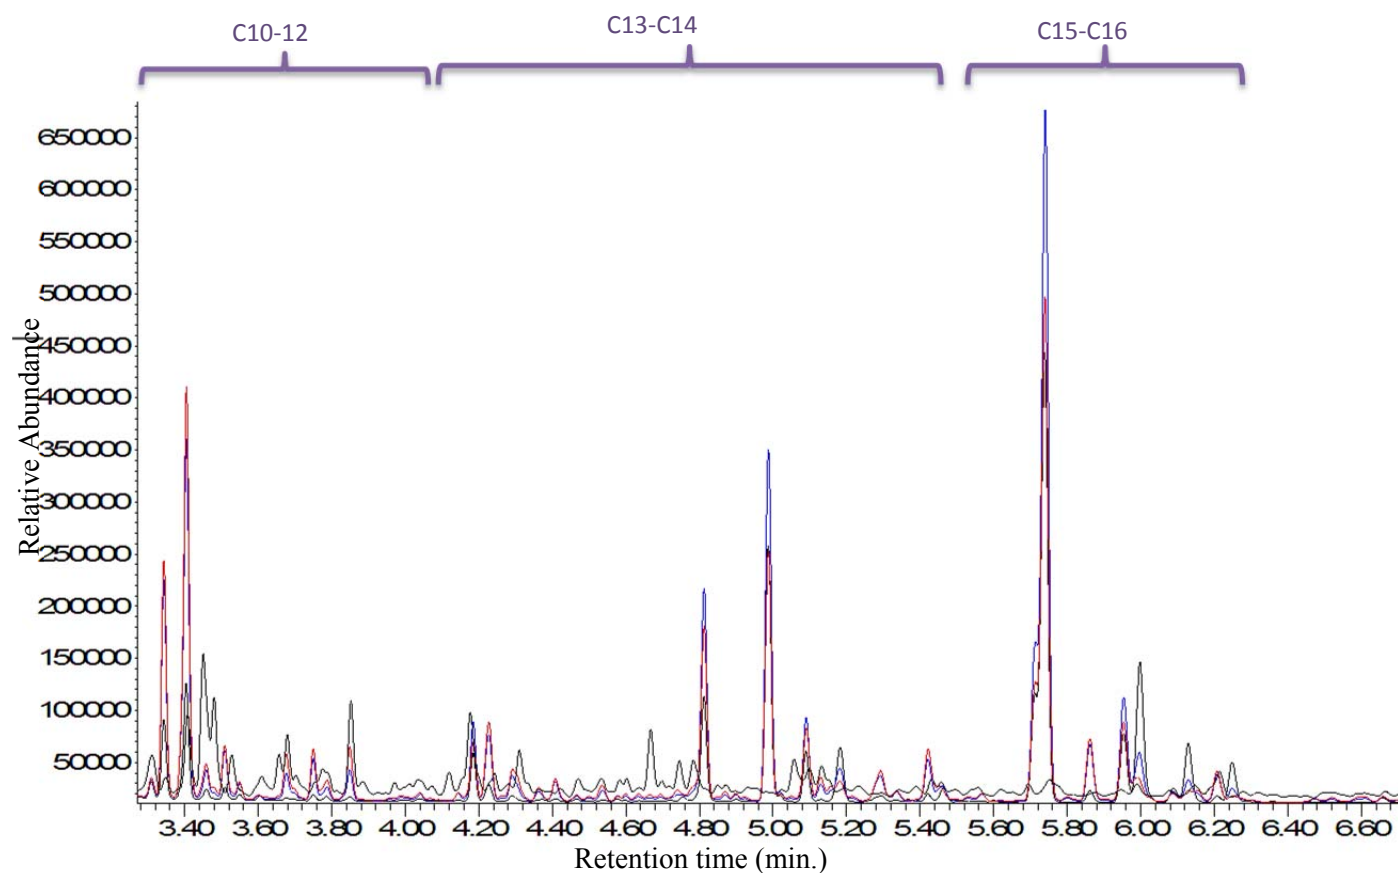

**Figure S4:** Representative gas chromatograms of major products from the dimerization and cross-coupling of mixed olefin feed during the first hours of reaction ( $t = 0.5\text{h}$  (blue trace);  $t = 2\text{h}$  (red trace);  $t = 3\text{h}$  (black trace)).

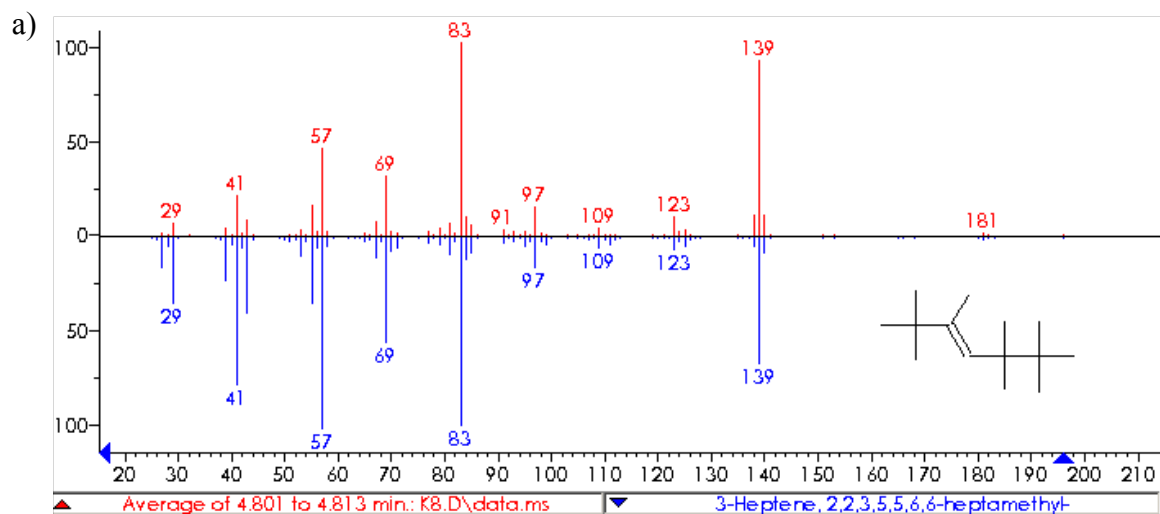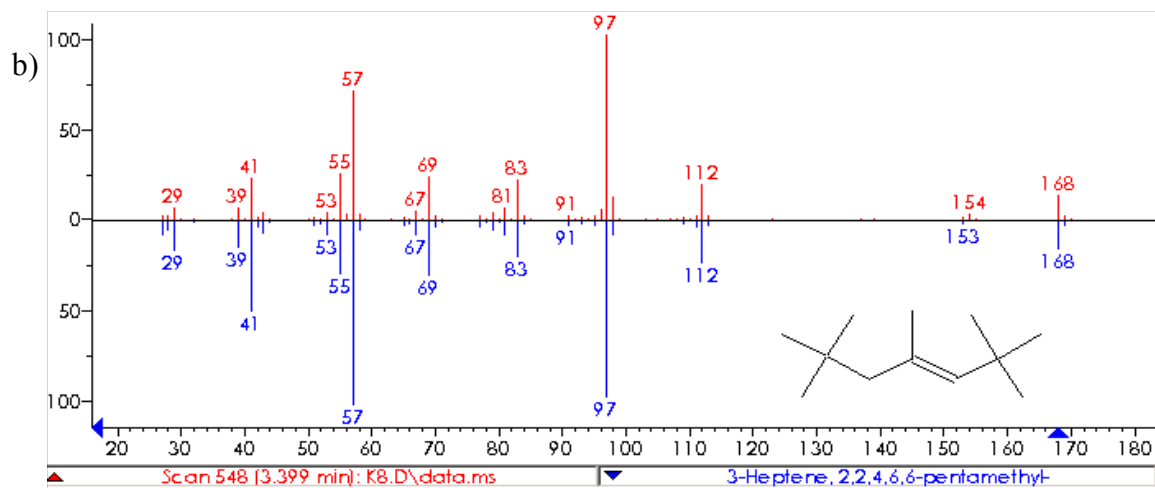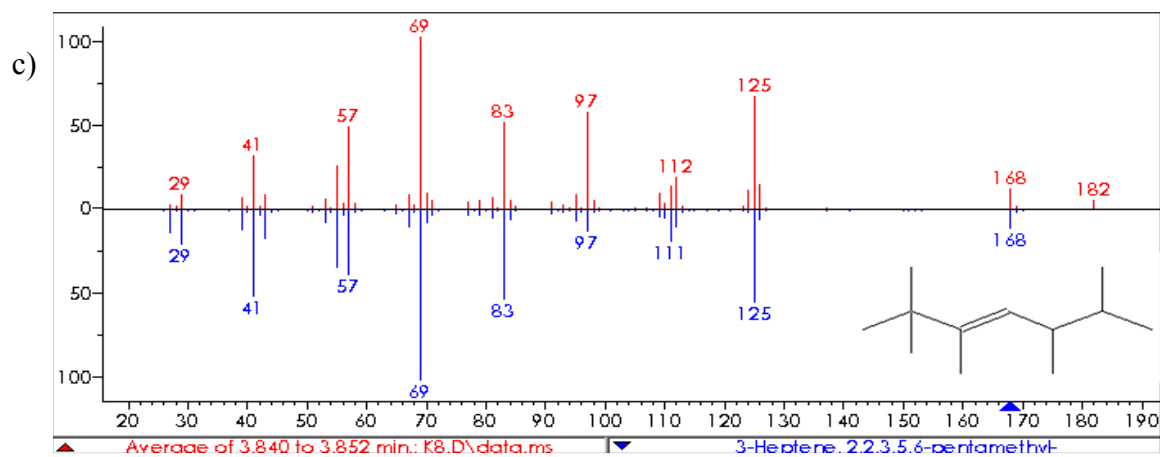

d)

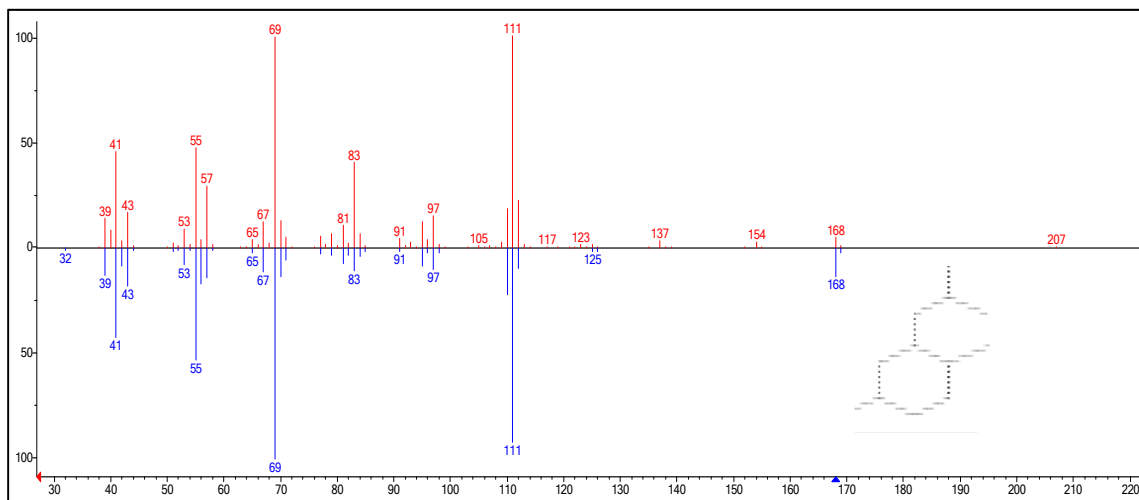

**Figure S5:** a) Mass spectrum of the major product from triptene dimerization co-located over the mass spectrum of 2,2,3,5,5,6,6-heptamethyl-3-heptene as provided in the NIST library. b) A mass spectrum of a C12 product co-located over the mass spectrum of 2,2,4,6,6-pentamethyl-3-heptene. c) A mass spectrum of another product co-located over the mass spectrum of 2,2,3,5,6-pentamethyl-3-heptene. d) A mass spectrum of another product co-located over the mass spectrum of 2-isobutyl-1,4-dimethylcyclohexane.

a)

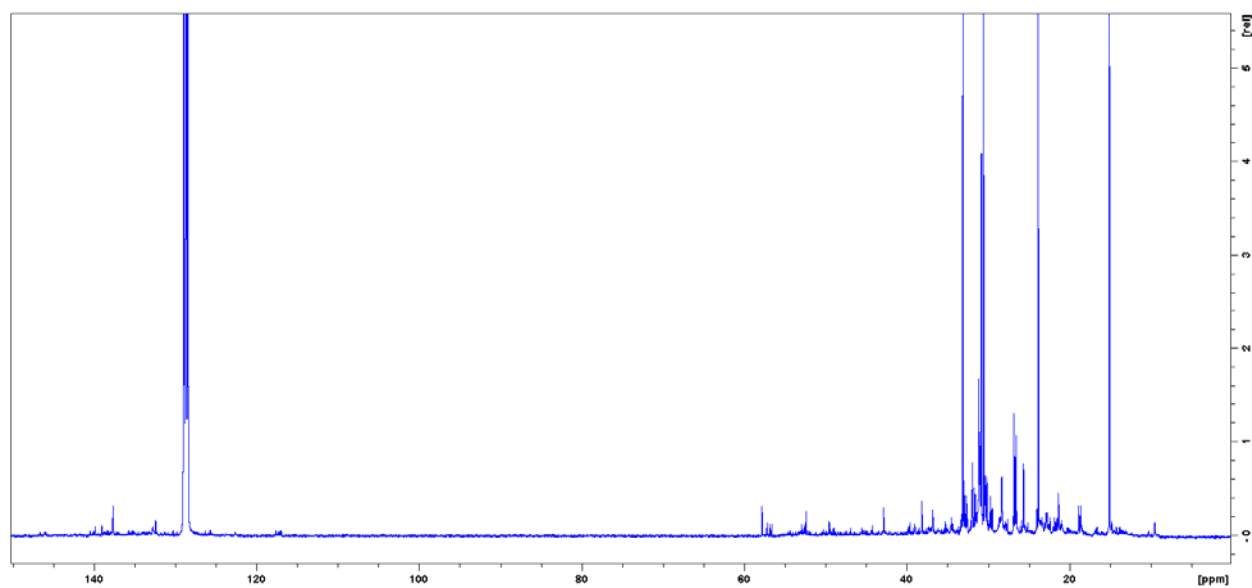

b)

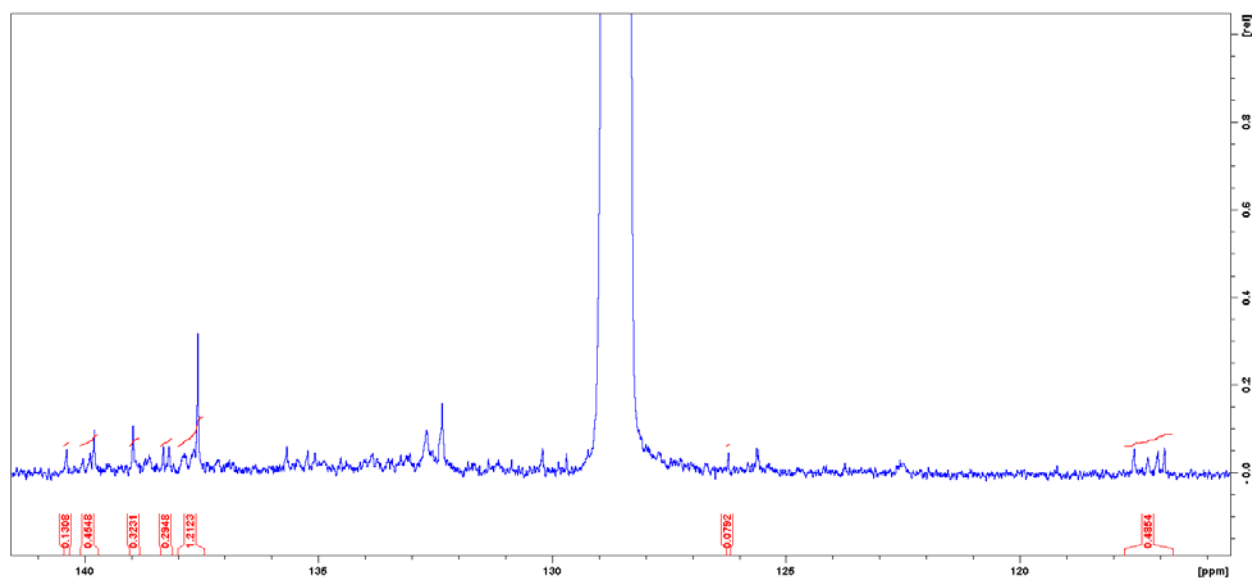

c)

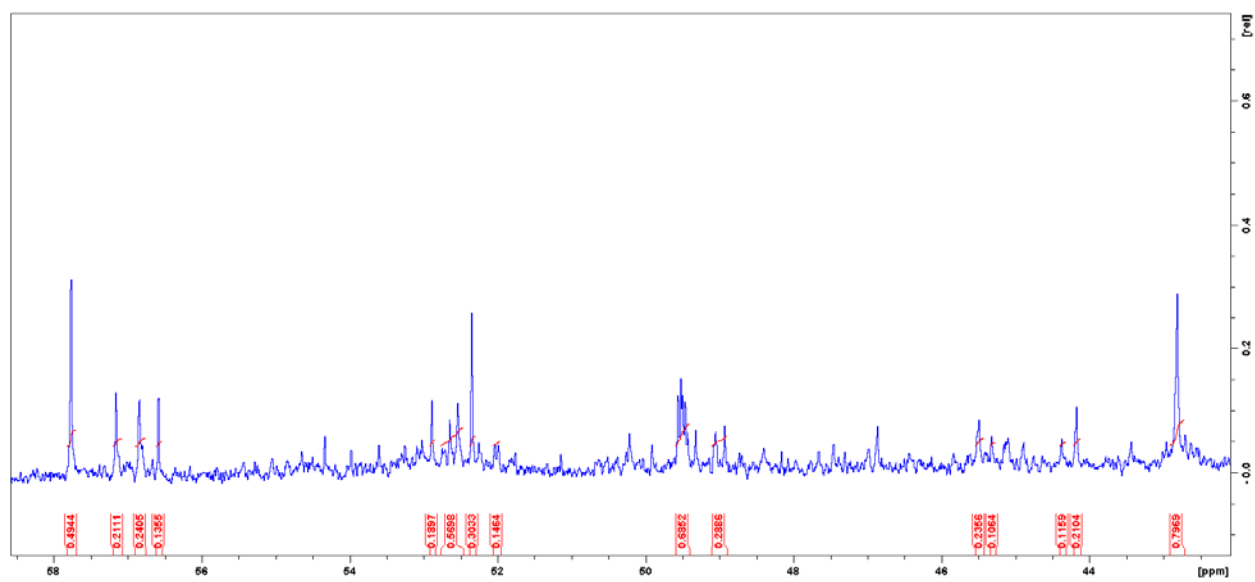

d)

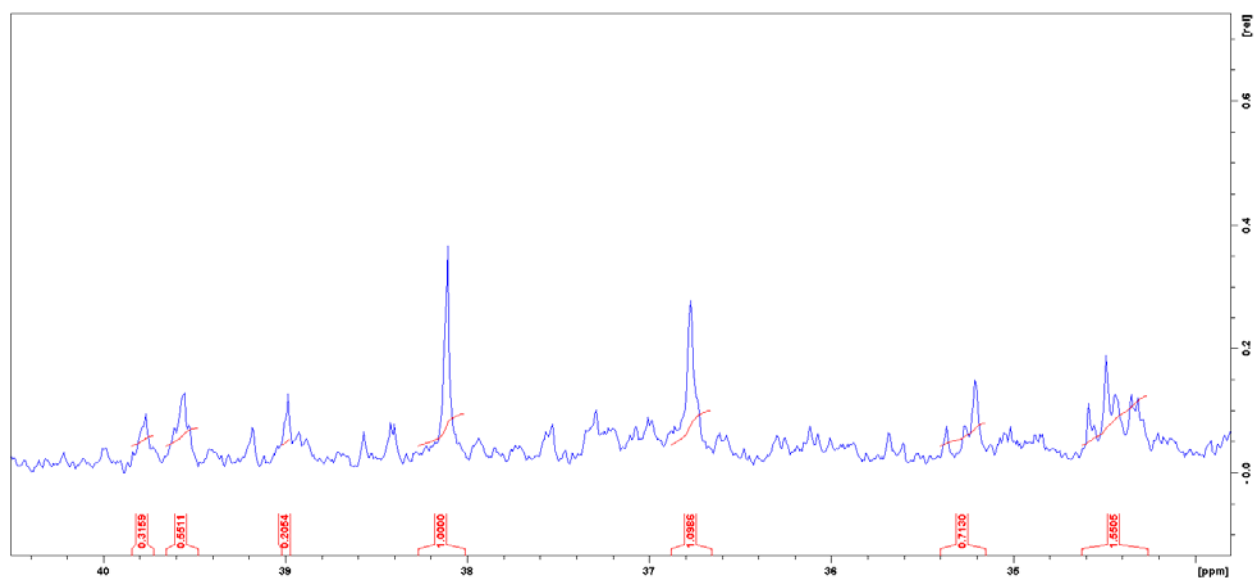

e)

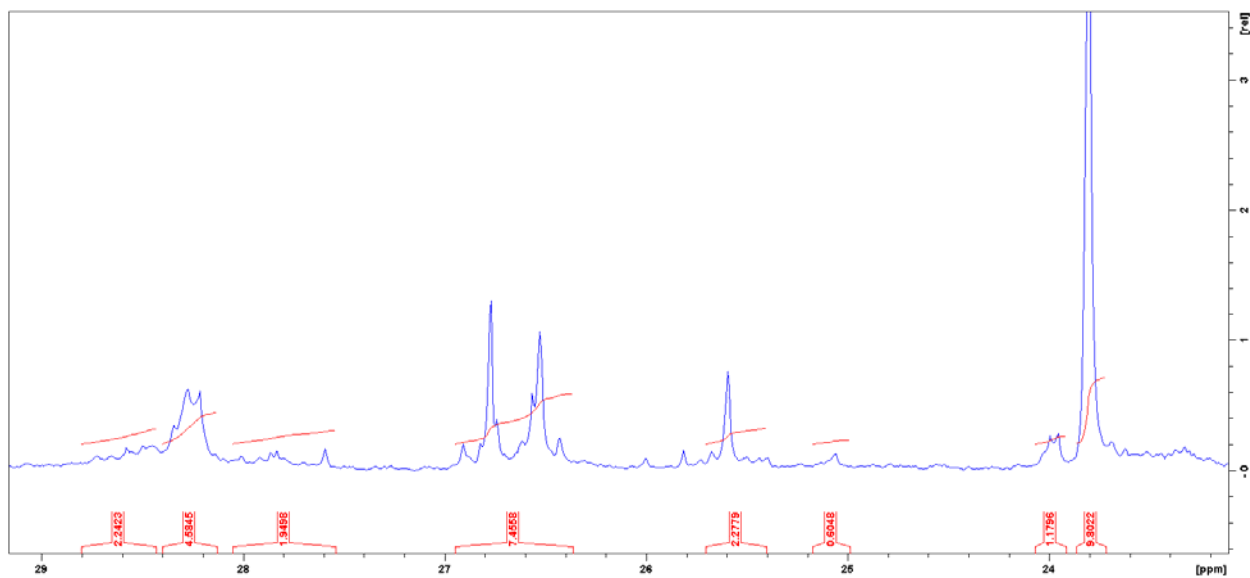

f)

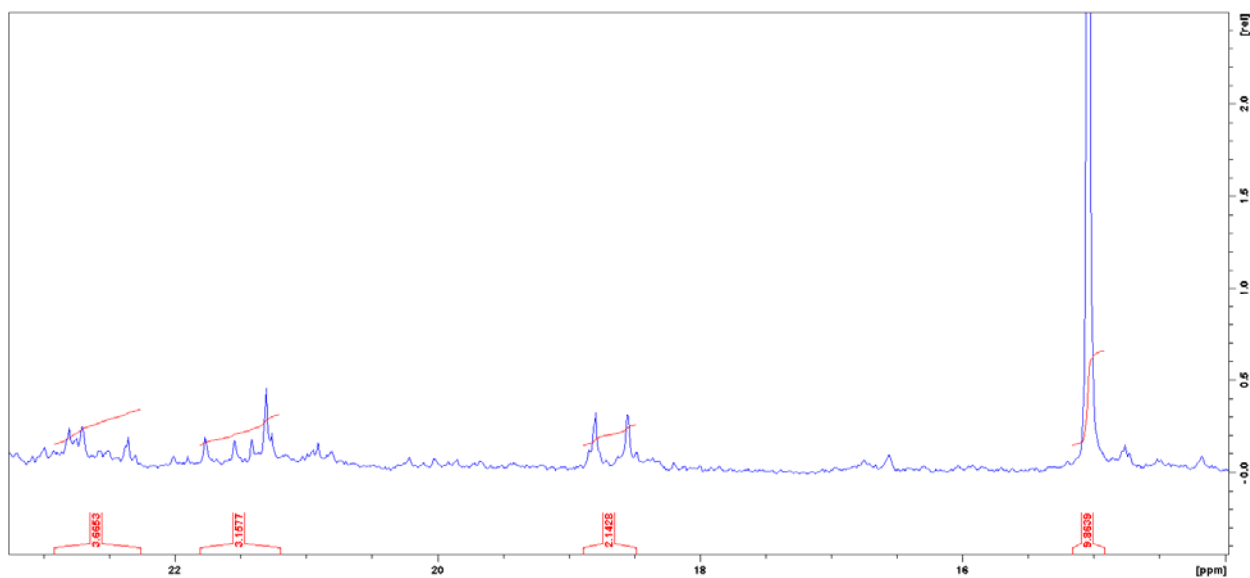

**Figure S6:** Representative  $^{13}\text{C}$ -NMR spectra of the product from coupling of mixed olefin feed: (a) Full  $^{13}\text{C}$ -NMR spectrum (the large peak at 128.6 ppm is Benzene (i.e., carrier medium)). An expanded view of (a) in the region of (b) 115-142 ppm, in the region of (c) 40-59 ppm, in the region of (d) 30-42 ppm, in the region of (e) 20-30 ppm and in the region of (f) 12-23 ppm.
